# Supplementary material
Source: Springer Nature journal article supplement (https://www.springermedizin.de/resource/supplementary/12885_2009_2083_MOESM1_ESM.pdf/9460476)

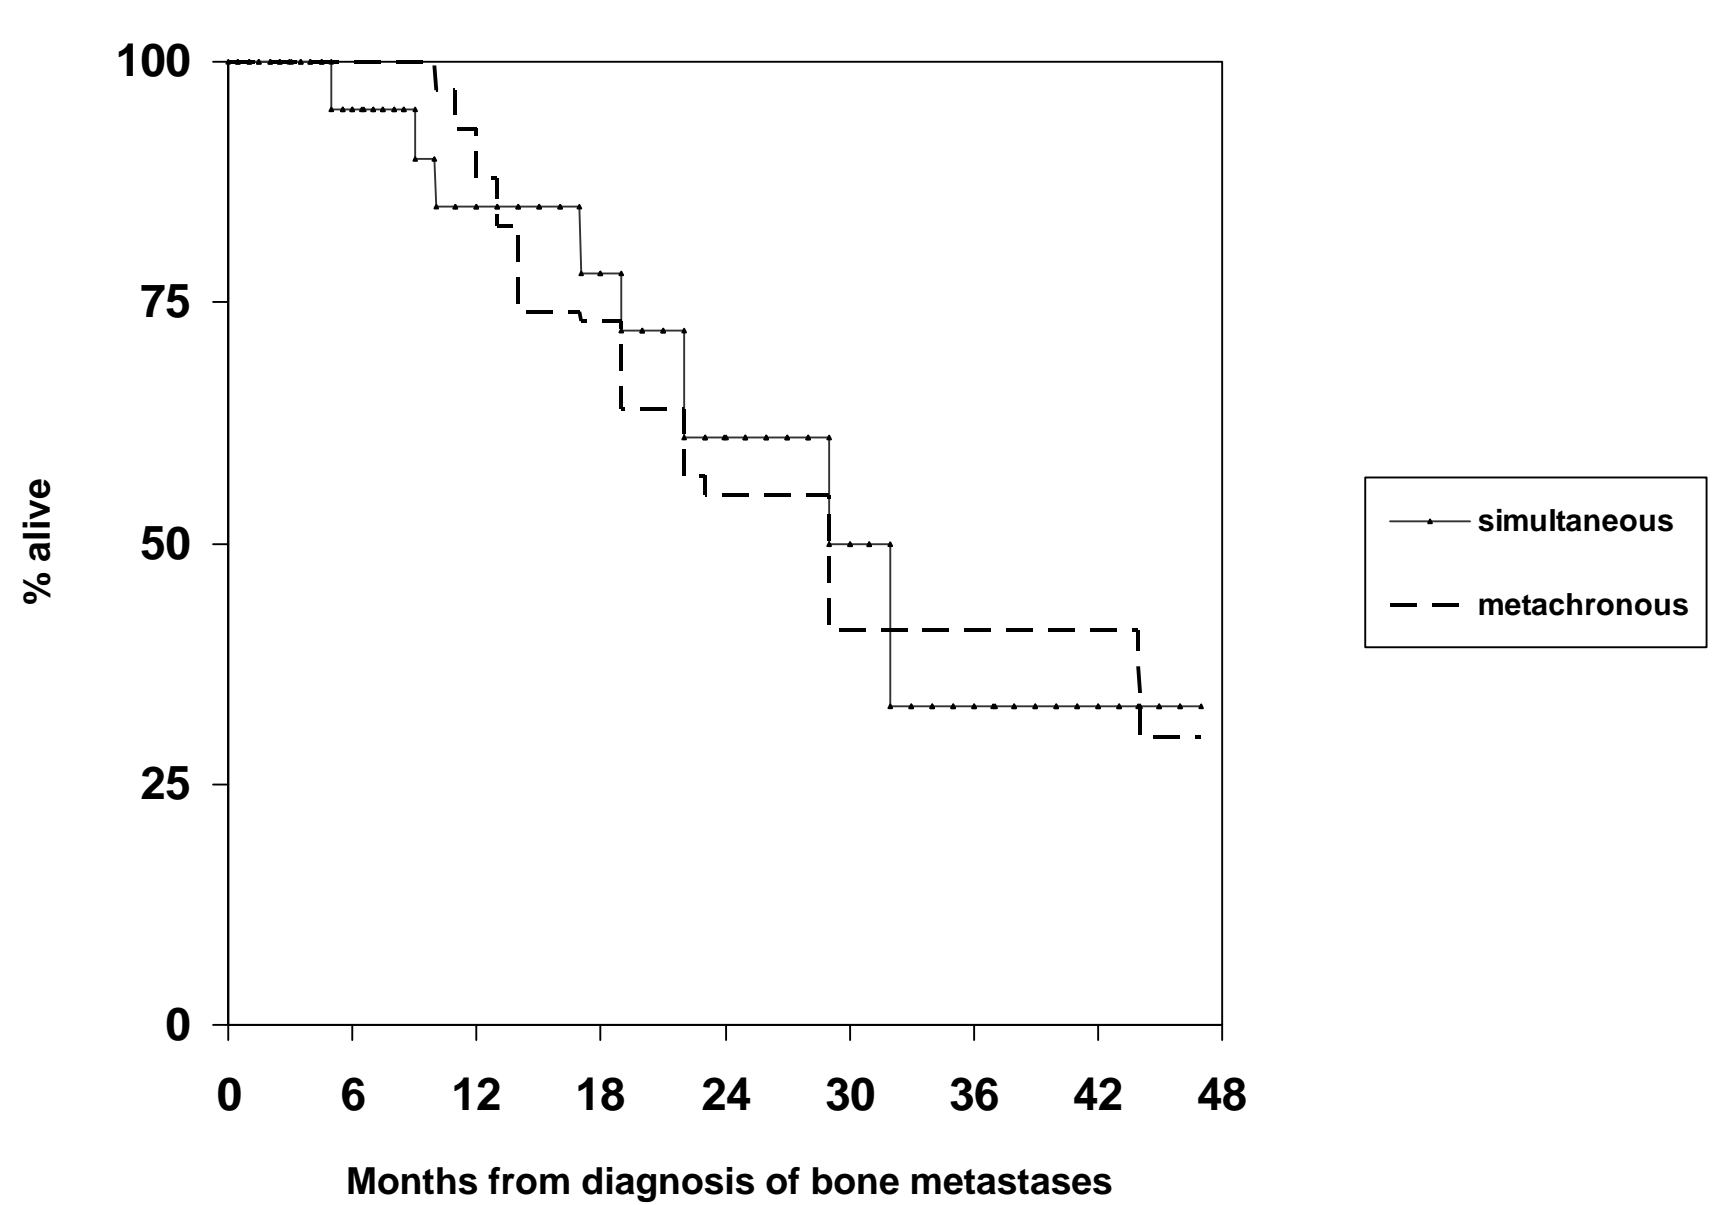

Supplement: MOESM1 [file 9460476]
